# Supplementary material for: Full-Length Multi-Barcoding: DNA Barcoding from Single Ingredient to Complex Mixtures
Source: MDPI journal article supplement (doi:10.3390/genes10050343), 2019-05-07
Supplement: s1 [file s1]

**Table S1.** Information of universal primers and tag-primers**(a)** Universal Primers

| Barcode region   | Primer       | Sequence (5'-3')          | Reference *                                     |
|------------------|--------------|---------------------------|-------------------------------------------------|
| ITS2             | P3 (Forward) | YGACTCTCGGCAACGGATA       | (Cheng et al., 2016)                            |
|                  | E4 (Reverse) | RGTTTCTTTTCCTCCGCTTA      | (Cheng et al., 2016)                            |
| <i>psbA-trnH</i> | PA (Forward) | GTTATGCATGAACGTAATGCTC    | (Sang, Crawford, & Stuessy, 1997)               |
|                  | TH (Reverse) | CGCGCATGGTGGATTACAAATCC   | (Tate & Simpson, 2003)                          |
| CO1              | LC (Forward) | GGTCAACAAATCATAAAGATATTGG | (Folmer, Black, Hoeh, Lutz, & Vrijenhoek, 1994) |
|                  | HC (Reverse) | TAAACTTCAGGGTGACCAAAAATCA | (Folmer et al., 1994)                           |

Note: \* Cheng, Tao, Xu, Chao, Lei, Li, Li, Changhao, Zhang, Yu, & Zhou, Shiliang. (2016). Barcoding the kingdom Plantae: new PCR primers for ITS regions of plants with improved universality and specificity. *Molecular Ecology Resources*, 16(1), 138-149. doi: 10.1111/1755-0998.12438; Folmer, O., Black, M., Hoeh, W., Lutz, R., & Vrijenhoek, R. (1994). DNA primers for amplification of mitochondrial cytochrome c oxidase subunit I from diverse metazoan invertebrates. *Molecular marine biology and biotechnology*, 3(5), 294-299. ; Sang, T., Crawford, D., & Stuessy, T. (1997). Chloroplast DNA phylogeny, reticulate evolution, and biogeography of *Paeonia* (Paeoniaceae). *Am J Bot*, 84(8), 1120. ; Tate, Jennifer, & Simpson, Beryl. (2003). *Paraphyly of Tarasa (Malvaceae) and Diverse Origins of the Polyploid Species* (Vol. 28).

**(b)** Tag-primers

| Barcode region   | Tag-primer | Sequence (5'-3')                      |
|------------------|------------|---------------------------------------|
| ITS2             | P3-1       | ATCATCAGTCGACAYGACTCTCGGCAACGGATA     |
|                  | P3-2       | ATCATCAGTATCACYGACTCTCGGCAACGGATA     |
|                  | P3-3       | ATCATCAGTGCGTAYGACTCTCGGCAACGGATA     |
|                  | P3-4       | ATCATCAGACGCTAYGACTCTCGGCAACGGATA     |
|                  | P3-5       | ATCATCAGAGCTAGYGACTCTCGGCAACGGATA     |
|                  | E4-A       | ATCATCAGTCGACARGTTTCTTTTCCTCCGCTTA    |
|                  | E4-B       | ATCATCAGTATCACRGTTTCTTTTCCTCCGCTTA    |
|                  | E4-C       | ATCATCAGTGCGTARGTTTCTTTTCCTCCGCTTA    |
|                  | E4-D       | ATCATCAGACGCTARGTTTCTTTTCCTCCGCTTA    |
|                  |            |                                       |
| <i>psbA-trnH</i> | PA-1       | ATCATCAGTCGACAGTTATGCATGAACGTAATGCTC  |
|                  | PA-2       | ATCATCAGTATCACGTTATGCATGAACGTAATGCTC  |
|                  | PA-3       | ATCATCAGTGCGTAGTTATGCATGAACGTAATGCTC  |
|                  | PA-4       | ATCATCAGACGCTAGTTATGCATGAACGTAATGCTC  |
|                  | PA-5       | ATCATCAGAGCTAGGTTATGCATGAACGTAATGCTC  |
|                  | TH-A       | ATCATCAGTCGACACGCGCATGGTGGATTACAAATCC |
|                  | TH-B       | ATCATCAGTATCACCGCGCATGGTGGATTACAAATCC |
|                  | TH-C       | ATCATCAGTGCGTACGCGCATGGTGGATTACAAATCC |
|                  | TH-D       | ATCATCAGACGCTACGCGCATGGTGGATTACAAATCC |

|     |      |                                          |
|-----|------|------------------------------------------|
| COI | LC-1 | ATCATCAGTCGACAGGTCAACAAATCATAAAGATATTGG  |
|     | LC-2 | ATCATCAGTATCACGGTCAACAAATCATAAAGATATTGG  |
|     | LC-3 | ATCATCAGTGCGTAGGTCAACAAATCATAAAGATATTGG  |
|     | LC-4 | ATCATCAGACGCTAGGTCAACAAATCATAAAGATATTGG  |
|     | LC-5 | ATCATCAGAGCTAGGGTCAACAAATCATAAAGATATTGG  |
|     | HC-A | ATCATCAGTCGACATAAACTTCAGGGTGACCAAAAAATCA |
|     | HC-B | ATCATCAGTATCACTAACTTCAGGGTGACCAAAAAATCA  |
|     | HC-C | ATCATCAGTGCGTATAAACTTCAGGGTGACCAAAAAATCA |
|     | HC-D | ATCATCAGACGCTATAAACTTCAGGGTGACCAAAAAATCA |
|     |      |                                          |
