# Supplementary material for: Full-Length Multi-Barcoding: DNA Barcoding from Single Ingredient to Complex Mixtures
Source: MDPI journal article supplement (doi:10.3390/genes10050343), 2019-05-07
Supplement: s1 [file s1]

**Table S2.** Distribution of amplicons in different sequencing Cells and their corresponding tag-primers pairs

| SMRT Cell | DNA sample                      | Pairs code <sup>#</sup> | Tag-primer |         |
|-----------|---------------------------------|-------------------------|------------|---------|
|           |                                 |                         | Forward    | Reverse |
| Cell A    | HMA                             | T17                     | PA-5       | TH-A    |
|           | HMB                             | T18                     | PA-5       | TH-B    |
|           | HMC                             | T19                     | PA-5       | TH-C    |
|           | SMS1                            | T13                     | PA-4       | TH-A    |
|           | SMS2                            | T14                     | PA-4       | TH-B    |
|           | SMS3                            | T15                     | PA-4       | TH-C    |
|           | SMS1                            | i13                     | P3-4       | E4-A    |
|           | SMS2                            | i14                     | P3-4       | E4-B    |
|           | SMS3                            | i15                     | P3-4       | E4-C    |
|           | HMA                             | i17                     | P3-5       | E4-A    |
|           | HMB                             | i18                     | P3-5       | E4-B    |
|           | HMC                             | i19                     | P3-5       | E4-C    |
| Cell B    | RS1                             | i5                      | P3-2       | E4-A    |
|           | RS2                             | i6                      | P3-2       | E4-B    |
|           | RS3                             | i7                      | P3-2       | E4-C    |
|           | WW1                             | i9                      | P3-3       | E4-A    |
|           | WW2                             | i10                     | P3-3       | E4-B    |
|           | WW3                             | i11                     | P3-3       | E4-C    |
|           | MD1                             | T1                      | PA-1       | TH-A    |
|           | MD2                             | T2                      | PA-1       | TH-B    |
|           | MD3                             | T3                      | PA-1       | TH-C    |
|           | MD4                             | T4                      | PA-1       | TH-D    |
|           | MD1                             | i1                      | P3-1       | E4-A    |
|           | MD2                             | i2                      | P3-1       | E4-B    |
|           | MD3**                           | i3                      | P3-1       | E4-C    |
|           | MD4                             | i4                      | P3-1       | E4-D    |
|           | WW1                             | T9                      | PA-3       | TH-A    |
|           | WW2                             | T10                     | PA-3       | TH-B    |
|           | WW3                             | T11                     | PA-3       | TH-C    |
|           | RS1                             | T5                      | PA-2       | TH-A    |
|           | RS2                             | T6                      | PA-2       | TH-B    |
|           | RS3                             | T7                      | PA-2       | TH-C    |
| Cell C    | MD3*                            | i3                      | P3-1       | E4-C    |
|           | JL                              | i39                     | P3-10      | E4-C    |
|           | DK                              | i40                     | P3-10      | E4-D    |
|           | FH                              | C9                      | LC-3       | HC-C    |
|           | SJS1 ( <i>Sanwei-Jili-San</i> ) | i23                     | P3-6       | E4-C    |
|           | SJS2                            | i22                     | P3-6       | E4-B    |
|           | SJS3                            | i21                     | P3-6       | E4-A    |
|           | SJS1                            | C1                      | LC-1       | HC-A    |
|           | SJS2                            | C2                      | LC-1       | HC-B    |
|           | SJS3                            | C3                      | LC-1       | HC-C    |
|           | JHC (DNA mixture)               | C6                      | LC-2       | HC-C    |
|           | JHC                             | i32                     | P3-8       | E4-D    |
|           | JHB                             | i31                     | P3-8       | E4-C    |
|           | JHA                             | i24                     | P3-6       | E4-D    |

Note: #, 'T'-*psbA-trnH*; 'i'-ITS2; 'C'-CO1. \*/\*\*, these two ITS2 amplicons were from the same DNA sample and tag-primer pairs, but have different PCR cycles (\*\*, 45 cycles for the one in Cell B; \*, 35 cycles for the other in Cell C).
