# Supplementary material for: Full-Length Multi-Barcoding: DNA Barcoding from Single Ingredient to Complex Mixtures
Source: MDPI journal article supplement (doi:10.3390/genes10050343), 2019-05-07
Supplement: s1 [file s1]

**Table S4.** Validation of different locus between two types of *Ophiopogon japonicus* in *psbA-trnH* region

| DNA ID | Original type                                                       | Code of tag-primer pairs | genotype and its number in Loc 88 of <i>psbA-trnH</i> |
|--------|---------------------------------------------------------------------|--------------------------|-------------------------------------------------------|
| MD1    | ‘Zhe’ <i>O. japonicus</i> ; Cixi, Zhejiang province; producing area | T1                       | 721G, 3A                                              |
| MD2    | ‘Zhe’ <i>O. japonicus</i> ; Xiangshan, Zhejiang province; wildness  | T2                       | 555G, 5A                                              |
| MD3    | ‘Chuan’ <i>O. japonicus</i> ; Santai, Sichuan province; Market B    | T3                       | 726A, 10G                                             |
| MD4    | ‘Chuan’ <i>O. japonicus</i> ; Sichuan province; Company C           | T4                       | 665A, 116G, 3-                                        |
| HMA    | Mixed by MD1                                                        | T17                      | 53G, 5A                                               |
| HMB    | Mixed by MD2                                                        | T18                      | 20G, 3A                                               |
| HMC    | Mixed by MD3                                                        | T19                      | 188A, 5G                                              |
| SMS1   | ‘Chuan’ <i>O. japonicus</i> (MD3) as its raw material               | T13                      | 130A, 6G                                              |
| SMS2   | ‘Chuan’ <i>O. japonicus</i> (MD3) as its raw material               | T14                      | 161A, 2G                                              |
| SMS3   | ‘Chuan’ <i>O. japonicus</i> (MD3) as its raw material               | T15                      | 28A                                                   |
