# Supplementary material for: Full-Length Multi-Barcoding: DNA Barcoding from Single Ingredient to Complex Mixtures
Source: MDPI journal article supplement (doi:10.3390/genes10050343), 2019-05-07
Supplement: s1 [file s1]

**Table S3.** Species identifying results on *Ophiopogon japonicus* by FLMB

| Sample ID       | tag-primer pairs | Nearest match species of resulting reads and its number |                                      |
|-----------------|------------------|---------------------------------------------------------|--------------------------------------|
|                 |                  | Barcode of ITS2                                         | Barcode of <i>psbA-trnH</i>          |
| MD1             | i1**/T1          | <i>Malva verticillata</i> 98                            | <b><i>O. japonicas</i> 724</b>       |
|                 |                  | <i>P. ginseng</i> 61                                    | <i>Panax sp.</i> 1                   |
|                 |                  | <b><i>O. japonicas</i> 59</b>                           |                                      |
|                 |                  | <i>S. chinensis</i> 14                                  |                                      |
|                 |                  | <i>Tribulus terrestris</i> 13                           |                                      |
|                 |                  | uncultured fungus 9                                     |                                      |
|                 |                  | <i>Artemisia tangutica</i> 7                            |                                      |
|                 |                  | <i>Cucumis melo</i> 1                                   |                                      |
|                 |                  | <i>Paeonia suffruticosa</i> 1                           |                                      |
|                 |                  | <i>Angelica sinensis</i> 1                              |                                      |
|                 |                  | <i>Koeleria paniculata</i> 1                            |                                      |
|                 |                  | Uncultured Hygrocybe 1                                  |                                      |
|                 |                  | 2 no-blast-hit                                          |                                      |
|                 |                  |                                                         |                                      |
| MD2             | i2**/T2          | <i>P. ginseng</i> 232                                   | <b><i>O. japonicas</i> 560</b>       |
|                 |                  | <i>M. verticillata</i> 109                              | <i>Panax sp.</i> 14                  |
|                 |                  | <b><i>O. japonicas</i> 78</b>                           | <i>M. verticillata</i> 4             |
|                 |                  | <i>T. terrestris</i> 53                                 |                                      |
|                 |                  | <i>S. chinensis</i> 13                                  |                                      |
|                 |                  | <i>Artemisia capillaries</i> 9                          |                                      |
|                 |                  | <i>Cimicifuga dahurica</i> 4                            |                                      |
|                 |                  | <i>A. sinensis</i> 2                                    |                                      |
|                 |                  | <i>P. suffruticosa</i> 1                                |                                      |
|                 |                  | <i>Sophora japonica</i> 1                               |                                      |
|                 |                  | Uncultured fungus 3                                     |                                      |
|                 |                  | 7 no-blast-hit                                          |                                      |
|                 |                  |                                                         |                                      |
|                 |                  |                                                         |                                      |
| MD3<br>(Cell B) | i3**/T3          | <i>T. terrestris</i> 227                                | <b><i>O. japonicas</i> 736</b>       |
|                 |                  | <i>M. verticillata</i> 210                              | <i>Panax sp.</i> 11                  |
|                 |                  | <b><i>O. japonicas</i> 83</b>                           | <i>Polygonatum zanlanscianense</i> 1 |
|                 |                  | <i>P. ginseng</i> 30                                    | <i>T. terrestris</i> 1               |
|                 |                  | <i>Juglans regia</i> 3                                  |                                      |
|                 |                  | <i>S. chinensis</i> 1                                   |                                      |
|                 |                  | 14 no-blast-hit                                         |                                      |
|                 |                  |                                                         |                                      |
| MD4             | i4**/T4          | <i>P. ginseng</i> 107                                   | <b><i>O. japonicas</i> 784</b>       |
|                 |                  | <b><i>O. japonicas</i> 65</b>                           | <i>Panax sp.</i> 8                   |
|                 |                  | <i>M. verticillata</i> 63                               | <i>M. verticillata</i> 1             |
|                 |                  | <i>S. chinensis</i> 29                                  | 1 no-blast-hit                       |
|                 |                  | <i>T. terrestris</i> 27                                 |                                      |
|                 |                  | <i>A. sinensis</i> 3                                    |                                      |
|                 |                  | 8 no-blast-hit                                          |                                      |
|                 |                  |                                                         |                                      |
| MD3<br>(Cell C) | i3*              | <b><i>O. japonicas</i> 127</b>                          | /                                    |
|                 |                  | <i>M. verticillata</i> 89                               |                                      |
|                 |                  | <i>T. terrestris</i> 72                                 |                                      |
|                 |                  | <i>P. ginseng</i> 3                                     |                                      |

Note: \*\* The PCR cycles in the preparation of these four ITS2 amplicons were 35+10; \* 35 Cycles.  
no-blast-hit, resulting reads that with low Max. score or low Identities for top hits in BLAST.
